# Supplementary material for: Multiple conformations facilitate PilT function in the type IV pilus
Source: PubMed Central journal article supplement (PMC6858323; doi:10.1038/s41467-019-13070-z), 2019-11-15
Supplement: 41467_2019_13070_MOESM1_ESM.pdf [file 41467_2019_13070_MOESM1_ESM.pdf]

**Supplementary information**

Multiple conformations facilitate PilT function in the type IV pilus

Matthew McCallum *et al.*

**Supplementary Table 1. Defining the open- and closed-interfaces across PilT/VirB11-like family member structures.**

| Protein (PDB)                             | PDB <sup>Reference</sup> | System      | Inter-chain Ca distance (Å) <sup>*</sup> |           | Corresponding Interface <sup>**</sup> | Pattern of Interfaces |
|-------------------------------------------|--------------------------|-------------|------------------------------------------|-----------|---------------------------------------|-----------------------|
|                                           |                          |             | T221–H230                                | T221–L269 |                                       |                       |
| Methylated PilT <sup>Gm</sup>             | 6OJY <sup>Herein</sup>   | T4aP        | 5.8                                      | 14.1      | C                                     | OCOCOC                |
|                                           |                          |             | 12.2                                     | 8.9       | O                                     |                       |
| Low ADP PilT <sup>Gm</sup>                | 6OJZ <sup>Herein</sup>   | T4aP        | 5.8                                      | 14.0      | C                                     | OCOCOC                |
|                                           |                          |             | 13.6                                     | 8.3       | O                                     |                       |
| High ADP PilT <sup>Gm</sup>               | 6OK2 <sup>Herein</sup>   | T4aP        | 5.6                                      | 14.2      | C                                     | OCOCOC                |
|                                           |                          |             | 13.6                                     | 8.2       | O                                     |                       |
| ATP bound PilT <sup>Gm</sup>              | 6OJX <sup>Herein</sup>   | T4aP        | 6.1                                      | 12.3      | C                                     | CCCCCC                |
| ANP/ADP bound PilT <sup>Gm</sup>          | 6OKV <sup>Herein</sup>   | T4aP        | 5.4                                      | 13.7      | C                                     | CCOCCO                |
|                                           |                          |             | 11.6                                     | 9         | O                                     |                       |
| PilT <sup>Pa</sup>                        | 3JVV <sup>1</sup>        | T4aP        | 5.7                                      | 14.5      | C                                     | CCCCCC                |
| PilT <sup>Pa</sup>                        | 3JVU <sup>1</sup>        | T4aP        | 5.5                                      | 13.8      | C                                     | CCCCCC                |
| PilT <sup>Aa</sup>                        | 2GSZ <sup>2</sup>        | T4aP        | 7.6                                      | 19.4      | C                                     | OOCOOC                |
|                                           |                          |             | 15.8                                     | 9.9       | O                                     |                       |
| PilT <sup>Gs</sup>                        | 5ZFR <sup>3</sup>        | T4aP        | 12.0                                     | 6.5       | O                                     | OOOOOO                |
| PilT <sup>Aa</sup>                        | 2EWW <sup>2</sup>        | T4aP        | 11.2                                     | 13.7      | X                                     | XXXXXX                |
| PilT <sup>Aa</sup>                        | 2EWW <sup>2</sup>        | T4aP        | 10.9                                     | 13.7      | X                                     | XXXXXX                |
| PilB <sup>Gm</sup>                        | 5TSH <sup>4</sup>        | T4aP        | 5.9                                      | 20.6      | C                                     | CCOCCO                |
|                                           |                          |             | 22.5                                     | 10.0      | O                                     |                       |
| PilB <sup>Gm</sup>                        | 5TSG <sup>4</sup>        | T4aP        | 6.6                                      | 20.2      | C                                     | CCOCCO                |
|                                           |                          |             | 21.3                                     | 9.3       | O                                     |                       |
| PilB <sup>Tt</sup>                        | 5IT5 <sup>5</sup>        | T4aP        | 6.1                                      | 20.0      | C                                     | CCOCCO                |
|                                           |                          |             | 20.6                                     | 9.8       | O                                     |                       |
| PilB <sup>Tt</sup>                        | 5OIU <sup>6</sup>        | T4aP        | 6.1                                      | 20.2      | C                                     | CCOCCO                |
|                                           |                          |             | 21.4                                     | 9.8       | O                                     |                       |
| PilB <sup>Gs</sup>                        | 5ZFR <sup>3</sup>        | T4aP        | 6.1                                      | 20.5      | C                                     | CCOCCO                |
|                                           |                          |             | 21.4                                     | 9         | O                                     |                       |
| GspE                                      | 4KSR <sup>7</sup>        | T2S         | 7.4                                      | 19.6      | C                                     | CCOCCO                |
| GspE                                      | 4KSS <sup>7</sup>        | T2S         | 21.4                                     | 9.4       | O                                     | CCCCCC                |
| FlaI                                      | 4II7 <sup>8</sup>        | Archaeillum | 8.6                                      | 19.5      | C                                     | OCOCOC                |
|                                           |                          |             | 14.7                                     | 7.9       | O                                     |                       |
| FlaI                                      | 4IHQ <sup>8</sup>        | Archaeillum | 7.0                                      | 18.5      | C                                     | CCOCCO                |
|                                           |                          |             | 15.5                                     | 7.5       | O                                     |                       |
| Archaeal GspE                             | 2OAP <sup>9</sup>        | Archaeal    | 7.8                                      | 16.1      | C                                     | OCOCOC                |
|                                           |                          | T2S         | 11.4                                     | 8.8       | O                                     |                       |
| Archaeal GspE                             | 2OAQ <sup>9</sup>        | Archaeal    | 7.6                                      | 16.1      | C                                     | OCOCOC                |
|                                           |                          | T2S         | 11.9                                     | 9.8       | O                                     |                       |
| VirB11                                    | 1NLY <sup>10</sup>       | T4aS        | 5.0                                      | 13.0      | C                                     | CCCCCC                |
| VirB11                                    | 2PT7 <sup>11</sup>       | T4aS        | 6.0                                      | 14.3      | C                                     | CCCCCC                |
| VirB11                                    | 1NLZ <sup>10</sup>       | T4aS        | 5.0                                      | 13.0      | C                                     | CCCCCC                |
| VirB11                                    | 1OPX <sup>10</sup>       | T4aS        | 5.0                                      | 13.0      | C                                     | CCCCCC                |
| DotB                                      | 6GEB <sup>12</sup>       | T4bS        | 6.9                                      | 15.0      | C                                     | OCOCOC                |
|                                           |                          |             | 14.4                                     | 8.5       | O                                     |                       |
| DotB                                      | 6GEF <sup>12</sup>       | T4bS        | 7                                        | 13.1      | C                                     | CCOCCO                |
|                                           |                          |             | 16.8                                     | 9.2       | O                                     |                       |
| <b>CryoEM structures presented herein</b> |                          |             |                                          |           |                                       |                       |
| PilT <sup>Gm</sup>                        | 6OLL <sup>Herein</sup>   | T4aP        | 5.4                                      | 13.6      | C                                     | OOCOOC                |
|                                           |                          |             | 11.4                                     | 7.7       | O                                     |                       |
| PilT <sup>Gm</sup>                        | 6OLK <sup>Herein</sup>   | T4aP        | 6.0                                      | 13.4      | C                                     | OCOCOC                |
|                                           |                          |             | 12.6                                     | 7.9       | O                                     |                       |
| PilT <sup>Gm</sup>                        | 6OLM <sup>Herein</sup>   | T4aP        | 6.2                                      | 12.4      | C                                     | CCCCCC                |
| PilB <sup>Gm</sup>                        | 6OLJ <sup>Herein</sup>   | T4aP        | 6.4                                      | 20.2      | C                                     | CCOCCO                |
|                                           |                          |             | 22.7                                     | 9.4       | O                                     |                       |

<sup>\*</sup>Mean distance reported in the case when multiple open- or closed-interfaces are present in the same hexamer. In homologs of PilT<sup>Gm</sup>, residues that align with T221, H230, and L269 from PilT<sup>Gm</sup> are used: respectively, T233, H242, and L281 for PDB 2EWW, 2EWW, and 2GSZ; T220, H229, and L268 for PDB 3JVU and 3JVU; T221, H230, and L269 for PDB 5ZFR; T411, H420, and R455 for PDB 5TSH, 5TSG, 5ZFR, and 6OLJ; T735, H744, and R779 for PDB 5IT5; T245, H254, and R289 for PDB 5OIU; T251, H260, and L299 for PDB 6GEB; T266, H275, and L314 for PDB 6GEF; T350, H359, and R394 for PDB 4KSR and 4KSS; S263, H273, and H318 for PDB 1NLY, 2PT7, 1NLZ, and 1OPX; T356, H365, and M399 for PDB 2OAP and 2OAQ; and T351, H360, and L395 for PDB 4II7 and 4IHQ.

<sup>\*\*</sup>The open-interface defined as T221–H230 distance > 12 Å and T221–L269 distance < 11 Å. The closed-interface defined as T221–H230 distance < 9 Å and T221–L269 distance > 11 Å.

**Supplementary Table 2: Primers, strains, plasmids, and antibodies used in this study**

| Primers                                                                               | Sequence                                                                                                                                                         | Reference  |
|---------------------------------------------------------------------------------------|------------------------------------------------------------------------------------------------------------------------------------------------------------------|------------|
| P168                                                                                  | TATATATACATATGGCCAACATGCATCAGC                                                                                                                                   | This Study |
| P169                                                                                  | TATATATACTCGAGTTATCTCATGGGGGGGCG                                                                                                                                 | This Study |
| P220                                                                                  | TATAATGGTACCTACCGAGCTGCTCGCCTT                                                                                                                                   | This Study |
| P221                                                                                  | TATATATCTAGAATCAGAAAGTTTTCCGGGATCTT                                                                                                                              | This Study |
| E204A fwd                                                                             | CATCCTGGTGGCGCGGATG                                                                                                                                              | This Study |
| E204A rev                                                                             | CATCGCGCCGACCAGGATG                                                                                                                                              | This Study |
| H229A fwd                                                                             | TCGGCACCCCTGGCCACCACCTCG                                                                                                                                         | This Study |
| H229A rev                                                                             | CGAGGTGGTGGCCAGGGTGCCGA                                                                                                                                          | This Study |
| R239A fwd                                                                             | ACACGTGACCACCGCGTCGATGGTCTTC                                                                                                                                     | This Study |
| R239A rev                                                                             | GAAGACCATCGACGCGGTGGTCGACGTGT                                                                                                                                    | This Study |
| E219K fwd                                                                             | GTGGCCGGTCTTCGCCGCGGTCA                                                                                                                                          | This Study |
| E219K rev                                                                             | TGACCGCGGCGAAGACCGGCCAC                                                                                                                                          | This Study |
| D31K fwd                                                                              | ATGATCCGGGTGAATGGCGATGTACG                                                                                                                                       | This Study |
| D31K rev                                                                              | CGTACATCGCCATTCACCCGGATCAT                                                                                                                                       | This Study |
| E258A fwd                                                                             | CTCGATGCTCTCCGCGTCGCTGCAAT                                                                                                                                       | This Study |
| E258A rev                                                                             | ATTGCAGCGACGCGGAGAGCATCGAG                                                                                                                                       | This Study |
| R294E fwd                                                                             | GCGCGACCTTGTCCTCCTCGATCAGGTTGCGGAT                                                                                                                               | This Study |
| R294E rev                                                                             | ATCCGCAACCTGATCGAGGAGGACAAGGTCGCGC                                                                                                                               | This Study |
| D242K fwd                                                                             | GGCCGGGAACACCTTGACCACCCGGTC                                                                                                                                      | This Study |
| D242K rev                                                                             | GACCGGGTGGTCAAGGTGTTCCCGGCC                                                                                                                                      | This Study |
| T216R fwd                                                                             | TCCGCCGCCCTCAGGGCCAGGCGGA                                                                                                                                        | This Study |
| T216R rev                                                                             | TCCGCCGCGCCCTGAGCGCGCGGA                                                                                                                                         | This Study |
| R123D fwd                                                                             | ACCAGTACCAACCCGTCCGGGACGTCTGAAA                                                                                                                                  | This Study |
| R123D rev                                                                             | TTTCAGACGTCCCGGACGGTTGGTACTGGT                                                                                                                                   | This Study |
| K58A fwd                                                                              | GACATCATGAACGACGCGCAGCGCAAGGACTTC                                                                                                                                | This Study |
| K58A rev                                                                              | GAAGTCCTTGCGCTGCGCGTTCATGATGTC                                                                                                                                   | This Study |
| K58Q fwd                                                                              | GACATCATGAACGACGCGCAGCGCAAGGACTTC                                                                                                                                | This Study |
| K58Q rev                                                                              | GAAGTCCTTGCGCTGCGCGTTCATGATGTC                                                                                                                                   | This Study |
| K58R fwd                                                                              | GACATCATGAACGACCGTCAGCGCAAGGACTTC                                                                                                                                | This Study |
| K58R rev                                                                              | GAAGTCCTTGCGCTGACGGTTCATGATGTC                                                                                                                                   | This Study |
| Strains                                                                               | Description                                                                                                                                                      | Reference  |
| <i>E. coli</i> TOP10                                                                  | F <sup>-</sup> , mcrA Δ (mrr-hsdRMS-mcrBC) φ 80lacZ Δ M15 Δ lacX74 nupG recA1 araD139 Δ (ara-leu)7697 galE15 galK16 rpsL(Str <sup>R</sup> ) endA1 λ <sup>-</sup> | Invitrogen |
| <i>E. coli</i> BL21-CodonPlus® cells                                                  | Expression strain; F <sup>-</sup> ompT hsdS (rB <sup>-</sup> mB <sup>-</sup> ) dcm <sup>+</sup> Tet <sup>r</sup> gal λ (DE3) endA [argU proL Cam <sup>r</sup> ]  | Stratagene |
| <i>E. coli</i> BTH101                                                                 | BACTH coexpression strain; F <sup>-</sup> , cya-99, araD139, galE15, galK16, rpsL1, hsdR2, mcrA1, mcrB1                                                          | Euromex    |
| <i>P. aeruginosa</i> PAO1 pilT::FRT                                                   | Retraction deficient mutant with FRT disruption in pilT gene                                                                                                     | 13         |
| Plasmids                                                                              | Description                                                                                                                                                      | Reference  |
| pET28a::PilT <sup>PA</sup>                                                            | PilT from <i>P. aeruginosa</i> for expression in <i>E. coli</i>                                                                                                  | 14         |
| pET28a::PilB <sup>Gm</sup>                                                            | PilB from <i>G. metallireducens</i> for expression in <i>E. coli</i>                                                                                             | 4          |
| pET28a::PilT <sup>Gm</sup>                                                            | PilT4 from <i>G. metallireducens</i> for expression in <i>E. coli</i>                                                                                            | This Study |
| pBADGr                                                                                | pBAD plasmid with gentamicin resistance                                                                                                                          | 13         |
| pBADGr::PilT <sup>PA</sup>                                                            | PilT from <i>P. aeruginosa</i> for expression in <i>P. aeruginosa</i>                                                                                            | This Study |
| E204A, H229A, R239A, E219K, D31K, E258A, R294E, D242K, T216R, R123D, K58A, K58Q, K58R | pBADGr::PilT <sup>PA</sup> constructs with individual site mutations                                                                                             | This Study |
| pUT18C::PilC <sup>PA</sup>                                                            | PilC from <i>P. aeruginosa</i> BACTH construct                                                                                                                   | 15         |
| pUT18C::PilT <sup>PA</sup>                                                            | PilT from <i>P. aeruginosa</i> BACTH construct                                                                                                                   | 15         |
| pKT25::PilT <sup>PA</sup>                                                             | PilT from <i>P. aeruginosa</i> BACTH construct                                                                                                                   | 15         |
| E204A, H229A, R239A, E219K, D31K, E258A, R294E, D242K, T216R, R123D, K58A, K58Q, K58R | pKT25::PilT <sup>PA</sup> constructs with individual site mutations                                                                                              | This Study |
| Antibodies                                                                            | Description                                                                                                                                                      | Reference  |
| α-PilT                                                                                | Purified rabbit IgG antibody made with PilT from <i>P. aeruginosa</i>                                                                                            | 16         |

**Supplementary Table 3. Data collection and refinement statistics of PiIT crystal structures**

| Crystal structure name                                   | Methylated OCOCOC PiIT                                | Partial occupancy ADP OCOCOC PiIT                     | Full occupancy ADP OCOCOC PiIT                        | CCCCCC PiIT         | CCOCCO PiIT                                           |
|----------------------------------------------------------|-------------------------------------------------------|-------------------------------------------------------|-------------------------------------------------------|---------------------|-------------------------------------------------------|
| Relevant ligand                                          | SO <sub>4</sub> <sup>2-</sup>                         | Partial occupancy ADP                                 | Full occupancy ADP                                    | ATP                 | ANP and ADP                                           |
| <b>Data collection</b>                                   |                                                       |                                                       |                                                       |                     |                                                       |
| Facility                                                 | CLS                                                   | NSLS-II                                               | NSLS-II                                               | APS                 | CLS                                                   |
| Beamline                                                 | 08-ID-1                                               | 17-ID-2                                               | 17-ID-1                                               | 23-ID-B             | 08-ID-1                                               |
| Wavelength (Å)                                           | 0.97949                                               | 1.282140                                              | 0.999614                                              | 1.033202            | 0.97949                                               |
| Space group                                              | <i>P</i> 2 <sub>1</sub> 2 <sub>1</sub> 2 <sub>1</sub> | <i>P</i> 2 <sub>1</sub> 2 <sub>1</sub> 2 <sub>1</sub> | <i>P</i> 2 <sub>1</sub> 2 <sub>1</sub> 2 <sub>1</sub> | <i>P</i> 6          | <i>P</i> 2 <sub>1</sub> 2 <sub>1</sub> 2 <sub>1</sub> |
| <i>a</i> , <i>b</i> , <i>c</i> (Å)                       | 115.8, 119.01, 178.3                                  | 112.3, 121.1, 187.1                                   | 111.8 121.0 185.9                                     | 190.2, 190.2, 60.5  | 98.5, 127.1, 187.3                                    |
| <i>α</i> , <i>β</i> , <i>γ</i> (°)                       | 90, 90, 90                                            | 90, 90, 90                                            | 90, 90, 90                                            | 90, 90, 120         | 90, 90, 90                                            |
| Resolution (Å)                                           | 48-3.3<br>(3.4-3.3)                                   | 29-3.0<br>(3.1-3.0)                                   | 29-3.3<br>(3.4-3.3)                                   | 48-1.9<br>(2.0-1.9) | 48-4.0<br>(4.1-4.0)                                   |
| Total Reflections                                        | 281393                                                | 620489                                                | 258149                                                | 1037608             | 127072                                                |
| Unique Reflections                                       | 37753 (3658)                                          | 49747 (4342)                                          | 38771 (3597)                                          | 99891(9942)         | 38507 (1745)                                          |
| Redundancy                                               | 7.4 (7.6)                                             | 12.5 (12.1)                                           | 6.7 (6.0)                                             | 10.4 (10.3)         | 3.3 (0.6)                                             |
| Completeness (%)                                         | 100 (99)                                              | 98 (85)                                               | 99 (94)                                               | 100 (100)           | 98 (10)*                                              |
| Mean <i>I</i> / $\sigma$ <i>I</i>                        | 12.6 (2.3)                                            | 12 (2.2)                                              | 7.5 (1.3)                                             | 10.6 (1.3)          | 4.0 (1.6)                                             |
| <i>R</i> <sub>Sym</sub> (%)**                            | 16 (105)                                              | 16 (84)                                               | 16 (110)                                              | 12 (143)            | 28 (112)                                              |
| CC* (%)**                                                | 100 (93)                                              | 100 (95)                                              | 100 (87)                                              | 100 (89)            | 100 (86)                                              |
| <b>Refinement</b>                                        |                                                       |                                                       |                                                       |                     |                                                       |
| <i>R</i> <sub>work</sub> / <i>R</i> <sub>free</sub> (%)† | 21.0 / 24.5                                           | 19.3 / 23.1                                           | 21.2 / 25.43                                          | 18.4 / 21.2         | 24.8 / 27.6                                           |
| RMSD                                                     |                                                       |                                                       |                                                       |                     |                                                       |
| Bond lengths (Å)                                         | 0.005                                                 | 0.009                                                 | 0.008                                                 | 0.011               | 0.009                                                 |
| Bond angles (°)                                          | 0.90                                                  | 1.03                                                  | 0.84                                                  | 0.88                | 1.12                                                  |
| Ramachandran‡                                            |                                                       |                                                       |                                                       |                     |                                                       |
| Favoured (%)                                             | 98                                                    | 98                                                    | 98                                                    | 98                  | 98                                                    |
| Allowed (%)                                              | 100                                                   | 100                                                   | 100                                                   | 100                 | 100                                                   |
| Coordinate error (Å)§                                    | 0.34                                                  | 0.35                                                  | 0.52                                                  | 0.21                | 0.48                                                  |
| Atoms                                                    |                                                       |                                                       |                                                       |                     |                                                       |
| Protein                                                  | 16236                                                 | 16357                                                 | 16031                                                 | 8335                | 16010                                                 |
| Water                                                    | 191                                                   | 50                                                    | 12                                                    | 1099                | 12                                                    |
| Magnesium                                                | 0                                                     | 0                                                     | 0                                                     | 3                   | 4                                                     |
| ANP                                                      | 0                                                     | 0                                                     | 0                                                     | 0                   | 124                                                   |
| ATP                                                      | 0                                                     | 0                                                     | 0                                                     | 93                  | 0                                                     |
| ADP                                                      | 0                                                     | 162                                                   | 162                                                   | 0                   | 54                                                    |
| Sulfate                                                  | 30                                                    | 0                                                     | 0                                                     | 0                   | 0                                                     |
| Ethylene Glycol                                          | 0                                                     | 0                                                     | 0                                                     | 32                  | 0                                                     |
| Av. B-factors (Å <sup>2</sup> )                          |                                                       |                                                       |                                                       |                     |                                                       |
| Protein                                                  | 72.6                                                  | 81.3                                                  | 97.6                                                  | 44.2                | 86.4                                                  |
| Water                                                    | 26.1                                                  | 65.7                                                  | 70.8                                                  | 54.7                | 84.6                                                  |
| Ligands                                                  | 45.8                                                  | 89.9                                                  | 119                                                   | 35.7                | 87.1                                                  |
| <b>Deposited density and coordinate files</b>            |                                                       |                                                       |                                                       |                     |                                                       |
| PDB ID                                                   | 6OJY                                                  | 6OJZ                                                  | 6OK2                                                  | 6OJX                | 6OKV                                                  |

Note: Values in parentheses correspond to the highest resolution shell.

\* , Atypical completeness of the CCOCCO PiIT structures reflects anisotropic truncation

\*\* ,  $R_{Sym} = \frac{\sum \sum |I - \langle I \rangle|}{\sum \sum I}$ ,  $R_{Pim} = \frac{\sum \sqrt{1/(n-1)} \sum |I - \langle I \rangle|}{\sum \sum I}$ , and  $CC^* = \sqrt{2CC_{1/2}/(1+CC_{1/2})}$  where  $CC_{1/2}$  is the Pearson correlation coefficient of two half data sets as described elsewhere<sup>17</sup>

† ,  $R_{work} = \frac{\sum ||F_{obs}| - k|F_{calc}||}{\sum |F_{obs}|}$  where  $F_{obs}$  and  $F_{calc}$  are the observed and calculated structure factors, respectively.  $R_{free}$  is the sum extended over a subset of reflections (5%) excluded from all stages of the refinement

§ , Maximum-likelihood based Coordinate Error, as determined by PHENIX<sup>18</sup>

**Supplementary Table 4. CryoEM data acquisition, processing, atomic model statistics and map/model depositions.**

| Data collection                        |  | Tilted data collection       |  |  | All other samples |  |  |
|----------------------------------------|--|------------------------------|--|--|-------------------|--|--|
| Electron Microscope                    |  | Titan Krios                  |  |  | FEI Tecnai F20    |  |  |
| Tilt angle                             |  | 40°                          |  |  | 0°                |  |  |
| Camera                                 |  | Falcon 3EC                   |  |  | Gatan K2 Summit   |  |  |
| Voltage (kV)                           |  | 300                          |  |  | 200               |  |  |
| Nominal Magnification                  |  | 75000                        |  |  | 25000             |  |  |
| Calibrated Pixel size (Å)              |  | 1.06                         |  |  | 1.45              |  |  |
| Exposure rate (e/pixel/s)              |  | 0.8                          |  |  | 5                 |  |  |
| Exposure (e/Å <sup>2</sup> )           |  | 42.7                         |  |  | 35                |  |  |
| Frames                                 |  | 30                           |  |  | 30                |  |  |
| Image processing                       |  | Tilted data collection       |  |  | All other samples |  |  |
| Motion correction software             |  | cryoSPARC v2                 |  |  | cryoSPARC v2      |  |  |
| CTF estimation software                |  | CTFFIND4 (refined with GCTF) |  |  | CTFFIND4          |  |  |
| Particle selection software            |  | cryoSPARC v2                 |  |  | cryoSPARC v2      |  |  |
| Classification and refinement software |  | cryoSPARC v2                 |  |  | cryoSPARC v2      |  |  |

  

| Sample             | PiIT <sup>Gm</sup><br>Tilted<br>data | PiIT <sup>Gm</sup><br>No<br>nucleo-<br>tide<br>added | PiIT <sup>Gm</sup><br>1 mM<br>ATP | PiIT <sup>Gm</sup><br>0.1 mM<br>ADP | PiIT <sup>Gm</sup><br>1 mM<br>ADP | PiIT <sup>Gm</sup><br>1 mM<br>ATP &<br>0.1 mM<br>ADP | PiIT <sup>Gm</sup><br>1 mM<br>ATP &<br>1 mM<br>ADP | PiIT <sup>Pa</sup><br>No<br>nucleo-<br>tide<br>added | PiIT <sup>Pa</sup><br>K58A<br>No<br>nucleo-<br>tide<br>added | PiIB <sup>Gm</sup><br>No<br>nucleo-<br>tide<br>added |
|--------------------|--------------------------------------|------------------------------------------------------|-----------------------------------|-------------------------------------|-----------------------------------|------------------------------------------------------|----------------------------------------------------|------------------------------------------------------|--------------------------------------------------------------|------------------------------------------------------|
| Micrographs        | 570                                  | 64                                                   | 46                                | 21                                  | 31                                | 7                                                    | 14                                                 | 18                                                   | 43                                                           | 15                                                   |
| Selected particles | 286433                               | 35025                                                | 52331                             | 3668                                | 36814                             | 3438                                                 | 10990                                              | 22230                                                | 54715                                                        | 7394                                                 |

  

| EM maps                              | PiIT <sup>Gm</sup> Tilted data |                | PiIT <sup>Gm</sup> + 1 mM ATP |                | PiIB <sup>Gm</sup> |
|--------------------------------------|--------------------------------|----------------|-------------------------------|----------------|--------------------|
|                                      | OOCOOC                         | OCOCOC         | CCCCCC                        | CCCCCC         | CCOCCO             |
| Particle images contributing to maps | 100786                         | 94151          | 43823                         | 43823          | 3257               |
| Applied symmetry                     | C <sub>2</sub>                 | C <sub>3</sub> | C <sub>6</sub>                | C <sub>6</sub> | C <sub>2</sub>     |
| Applied B-factor (Å <sup>2</sup> )   | 177                            | 179            | 95                            | 95             | 498                |
| Global resolution (FSC = 0.143, Å)   | 4.1                            | 4.0            | 4.4                           | 4.4            | 7.8                |
| Model building                       | PiIT <sup>Gm</sup> Tilted data |                | PiIT <sup>Gm</sup> + 1 mM ATP |                | PiIB <sup>Gm</sup> |
|                                      | OOCOOC                         | OCOCOC         | CCCCCC                        | CCCCCC         | CCOCCO             |
| Modeling software                    | Coot, Phenix                   | Coot, Phenix   | Coot, Phenix                  | Coot, Phenix   | Coot, Phenix       |
| Atoms                                | 10426                          | 10323          | 10416                         | 10416          | 11442              |
| Protein                              | 10426                          | 10323          | 10416                         | 10416          | 11442              |
| ATP                                  | 0                              | 0              | 186                           | 186            | 0                  |
| RMSD                                 |                                |                |                               |                |                    |
| Bond length (Å)                      | 0.007                          | 0.005          | 0.006                         | 0.006          | 0.007              |
| Bond angle (°)                       | 1.06                           | 1.05           | 1.05                          | 1.05           | 1.43               |
| Ramachandran                         |                                |                |                               |                |                    |
| Favoured (%)                         | 98                             | 98             | 98                            | 98             | 98                 |
| Allowed                              | 99.8                           | 100            | 100                           | 100            | 100                |
| Clashscore                           | 0.4                            | 0.2            | 0.92                          | 0.92           | 2.46               |
| Av. B-factor (Å <sup>2</sup> )       |                                |                |                               |                |                    |
| Protein                              | 6.4                            | 3.1            | 22.2                          | 22.2           | 68.8               |
| Ligand                               | -                              | -              | 24.6                          | 24.6           | -                  |
| <i>MolProbity</i> score <sup>‡</sup> | 0.70                           | 0.65           | 0.78                          | 0.78           | 1.03               |
| CC <sub>mask</sub>                   | 0.50                           | 0.46           | 0.57                          | 0.57           | 0.42               |
| CC <sub>Ligand</sub>                 | -                              | -              | 0.67                          | 0.67           | -                  |
| Deposited maps and coordinate files  |                                |                |                               |                |                    |
| EMDB code                            | EMD-20116                      | EMD-20115      | EMD-20117                     | EMD-20117      | EMD-20114          |
| PDB code                             | 6OLL                           | 6OLK           | 6OLM                          | 6OLM           | 6OLJ               |

<sup>‡</sup>, As calculated using *MolProbity*<sup>19</sup> implemented in *PHENIX*

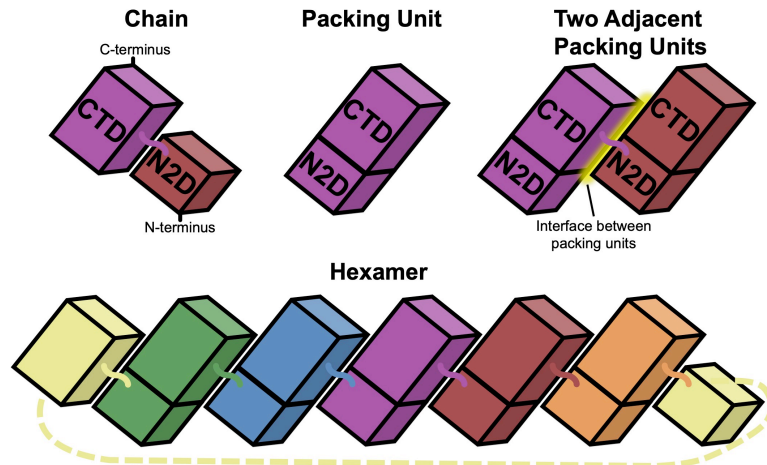

**Supplementary Figure 1 – Nomenclature used herein.** Each PilT chain is composed of two domains: N2D and CTD. The packing unit is composed of the N2D<sup>n</sup> and CTD<sup>n+1</sup>. Two adjacent packing units contact one-another creating an interface between packing units. Six packing units organize in this manner to create a hexamer.

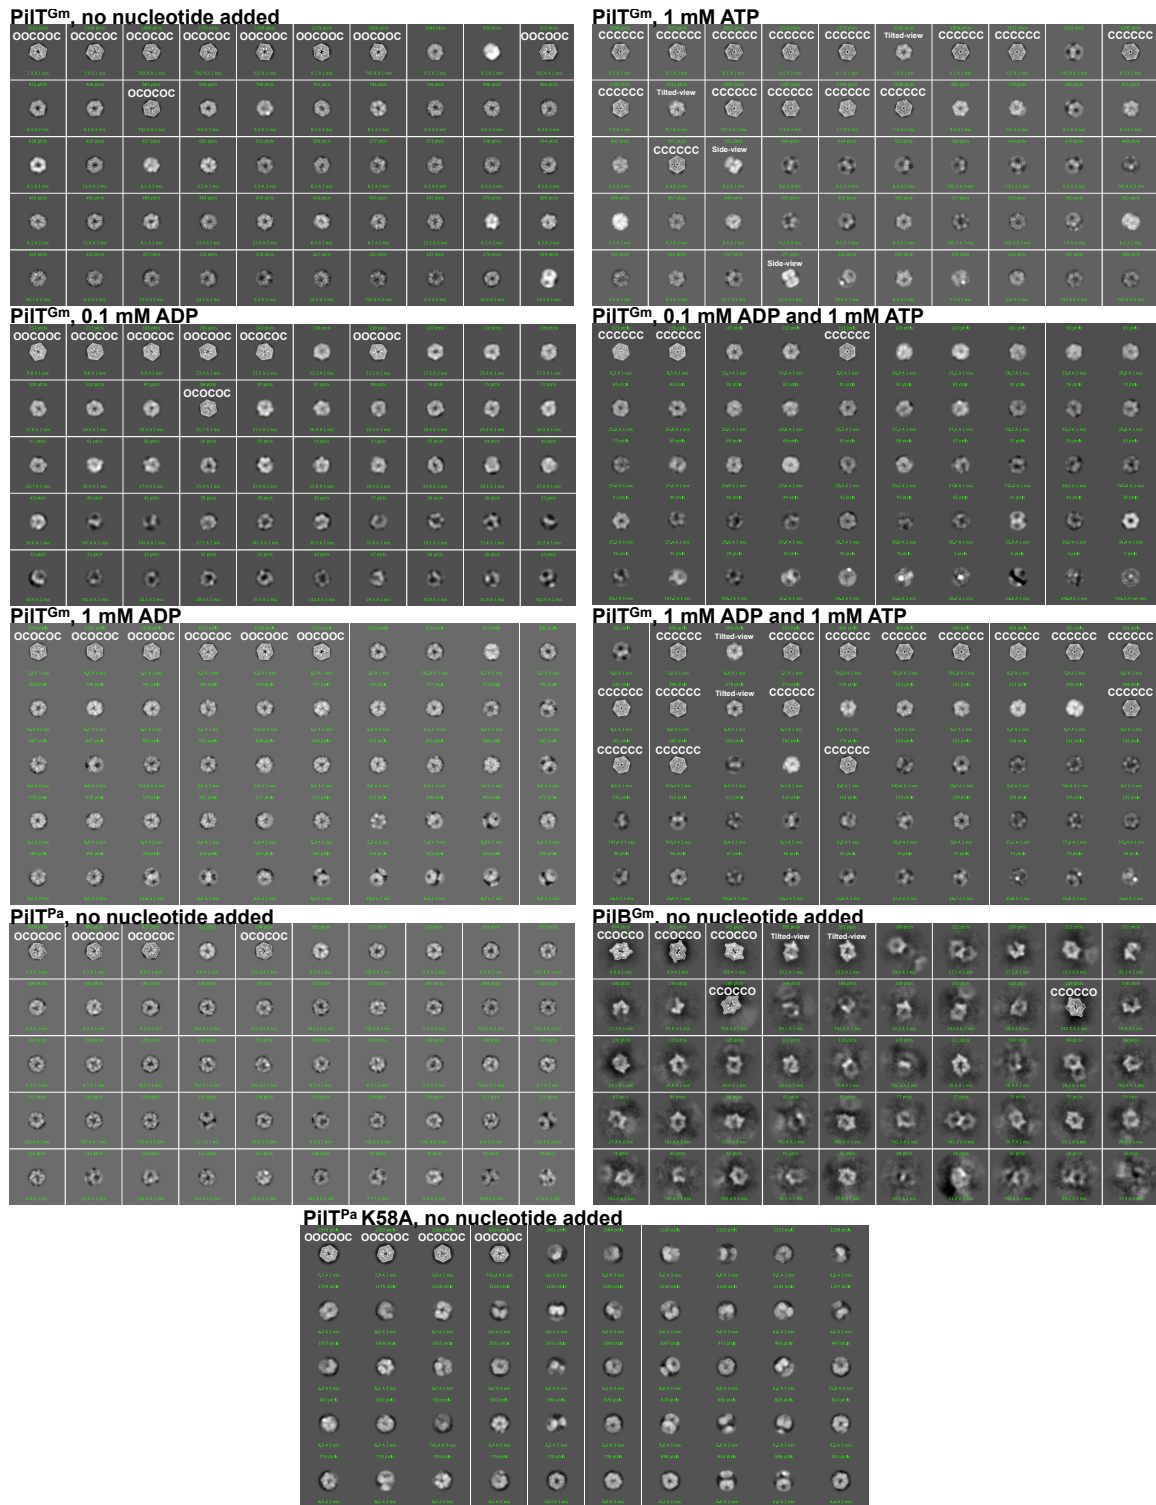

**Supplementary Figure 2 – 2D class averages of PiIB and PiIT particles and their proposed conformation.** The protein and nucleotide added are indicated above each list of 50 class averages. Class averages are sorted by the number of particles in each class. The qualitative assignment of the class average conformation is noted above each class average in white. A dotted outline of the conformation cartoon from Figure 4a is overlaid on the 2D class average for reference. Source data (without dotted outlines) are provided as a Source Data file. Class averages that were too blurry to identify the conformation are not annotated. Class averages that appear to represent tilted-views or side views are also labeled in white.

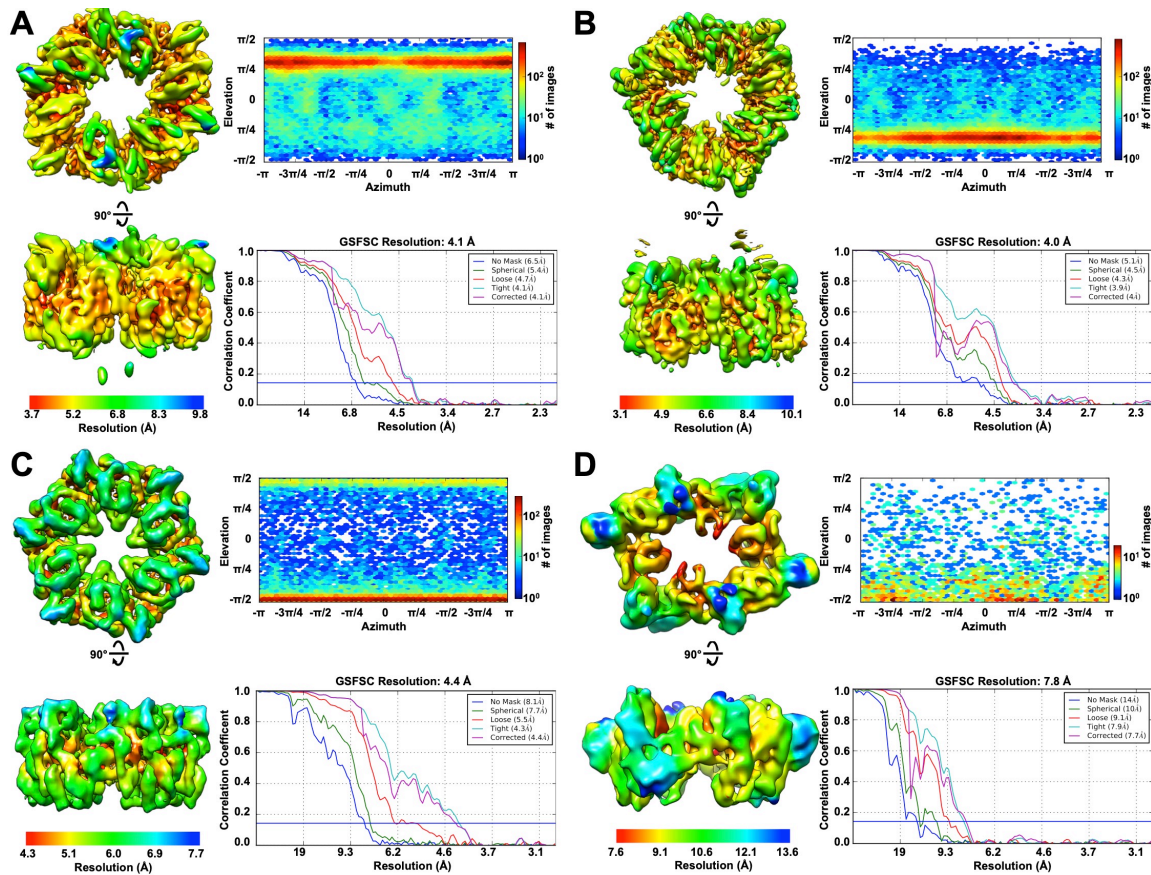

**Supplementary Figure 3 – Local resolution (left), particle distribution (upper right), and Fourier shell correlation (FSC) curves (lower right). a,** Locally sharpened PiIT<sup>Gm</sup> OCOOC conformation map. **b,** Locally sharpened PiIT<sup>Gm</sup> OCOCOC conformation map. **c,** Locally sharpened PiIT<sup>Gm</sup> CCCCC conformation map. **d,** Locally sharpened PiIB<sup>Gm</sup> CCOCOC conformation map.



## SUPPLEMENTARY REFERENCES

1. Misic, A.M., Satyshur, K.A. & Forest, K.T. P. aeruginosa PilT structures with and without nucleotide reveal a dynamic type IV pilus retraction motor. *J Mol Biol* **400**, 1011-21 (2010).
2. Satyshur, K.A. et al. Crystal structures of the pilus retraction motor PilT suggest large domain movements and subunit cooperation drive motility. *Structure* **15**, 363-76 (2007).
3. Solanki, V., Kapoor, S. & Thakur, K.G. Structural insights into the mechanism of Type IVa pilus extension and retraction ATPase motors. *FEBS J* **285**, 3402-3421 (2018).
4. McCallum, M., Tamman, S., Khan, A., Burrows, L.L. & Howell, P.L. The molecular mechanism of the type IVa pilus motors. *Nat Commun* **8**, 15091 (2017).
5. Mancl, J.M., Black, W.P., Robinson, H., Yang, Z. & Schubot, F.D. Crystal Structure of a Type IV Pilus Assembly ATPase: Insights into the Molecular Mechanism of PilB from *Thermus thermophilus*. *Structure* **24**, 1886-1897 (2016).
6. Collins, R. et al. Structural cycle of the *Thermus thermophilus* PilF ATPase: the powering of type IVa pilus assembly. *Sci Rep* **8**, 14022 (2018).
7. Lu, C. et al. Hexamers of the type II secretion ATPase GspE from *Vibrio cholerae* with increased ATPase activity. *Structure* **21**, 1707-17 (2013).
8. Reindl, S. et al. Insights into FlaI functions in archaeal motor assembly and motility from structures, conformations, and genetics. *Mol Cell* **49**, 1069-82 (2013).
9. Yamagata, A. & Tainer, J.A. Hexameric structures of the archaeal secretion ATPase GspE and implications for a universal secretion mechanism. *EMBO J* **26**, 878-90 (2007).
10. Savvides, S.N. et al. VirB11 ATPases are dynamic hexameric assemblies: new insights into bacterial type IV secretion. *EMBO J* **22**, 1969-80 (2003).
11. Hare, S. et al. Identification, structure and mode of action of a new regulator of the *Helicobacter pylori* HP0525 ATPase. *EMBO J* **26**, 4926-34 (2007).
12. Prevost, M.S. & Waksman, G. X-ray Crystal Structures of the Type IVb Secretion System DotB ATPases. *Protein Sci* **27**, 1464-75 (2018).
13. Asikyan, M.L., Kus, J.V. & Burrows, L.L. Novel proteins that modulate type IV pilus retraction dynamics in *Pseudomonas aeruginosa*. *J Bacteriol* **190**, 7022-34 (2008).
14. Chiang, P. et al. Functional role of conserved residues in the characteristic secretion NTPase motifs of the *Pseudomonas aeruginosa* type IV pilus motor proteins PilB, PilT and PilU. *Microbiology* **154**, 114-26 (2008).
15. McCallum, M. et al. PilN Binding Modulates the Structure and Binding Partners of the *Pseudomonas aeruginosa* Type IVa Pilus Protein PilM. *J Biol Chem* **291**, 11003-15 (2016).
16. Takhar, H.K., Kemp, K., Kim, M., Howell, P.L. & Burrows, L.L. The platform protein is essential for type IV pilus biogenesis. *J Biol Chem* **288**, 9721-8 (2013).
17. Karplus, P.A. & Diederichs, K. Linking crystallographic model and data quality. *Science* **336**, 1030-3 (2012).
18. Adams, P.D. et al. PHENIX: a comprehensive Python-based system for macromolecular structure solution. *Acta Crystallogr D Biol Crystallogr* **66**, 213-21 (2010).
19. Chen, V.B. et al. MolProbity: all-atom structure validation for macromolecular crystallography. *Acta Crystallogr D Biol Crystallogr* **66**, 12-21 (2010).
